# Supplementary material for: MV140 mucosal bacterial vaccine improves uropathogenic E. coli clearance in an experimental model of urinary tract infection
Source: Research Square preprint supplement (doi:10.21203/rs.3.rs-2992611/v1), 2023-06-07
Supplement: Supplementary file 1 [file d13204744d1ce07b822f29cc.pdf]

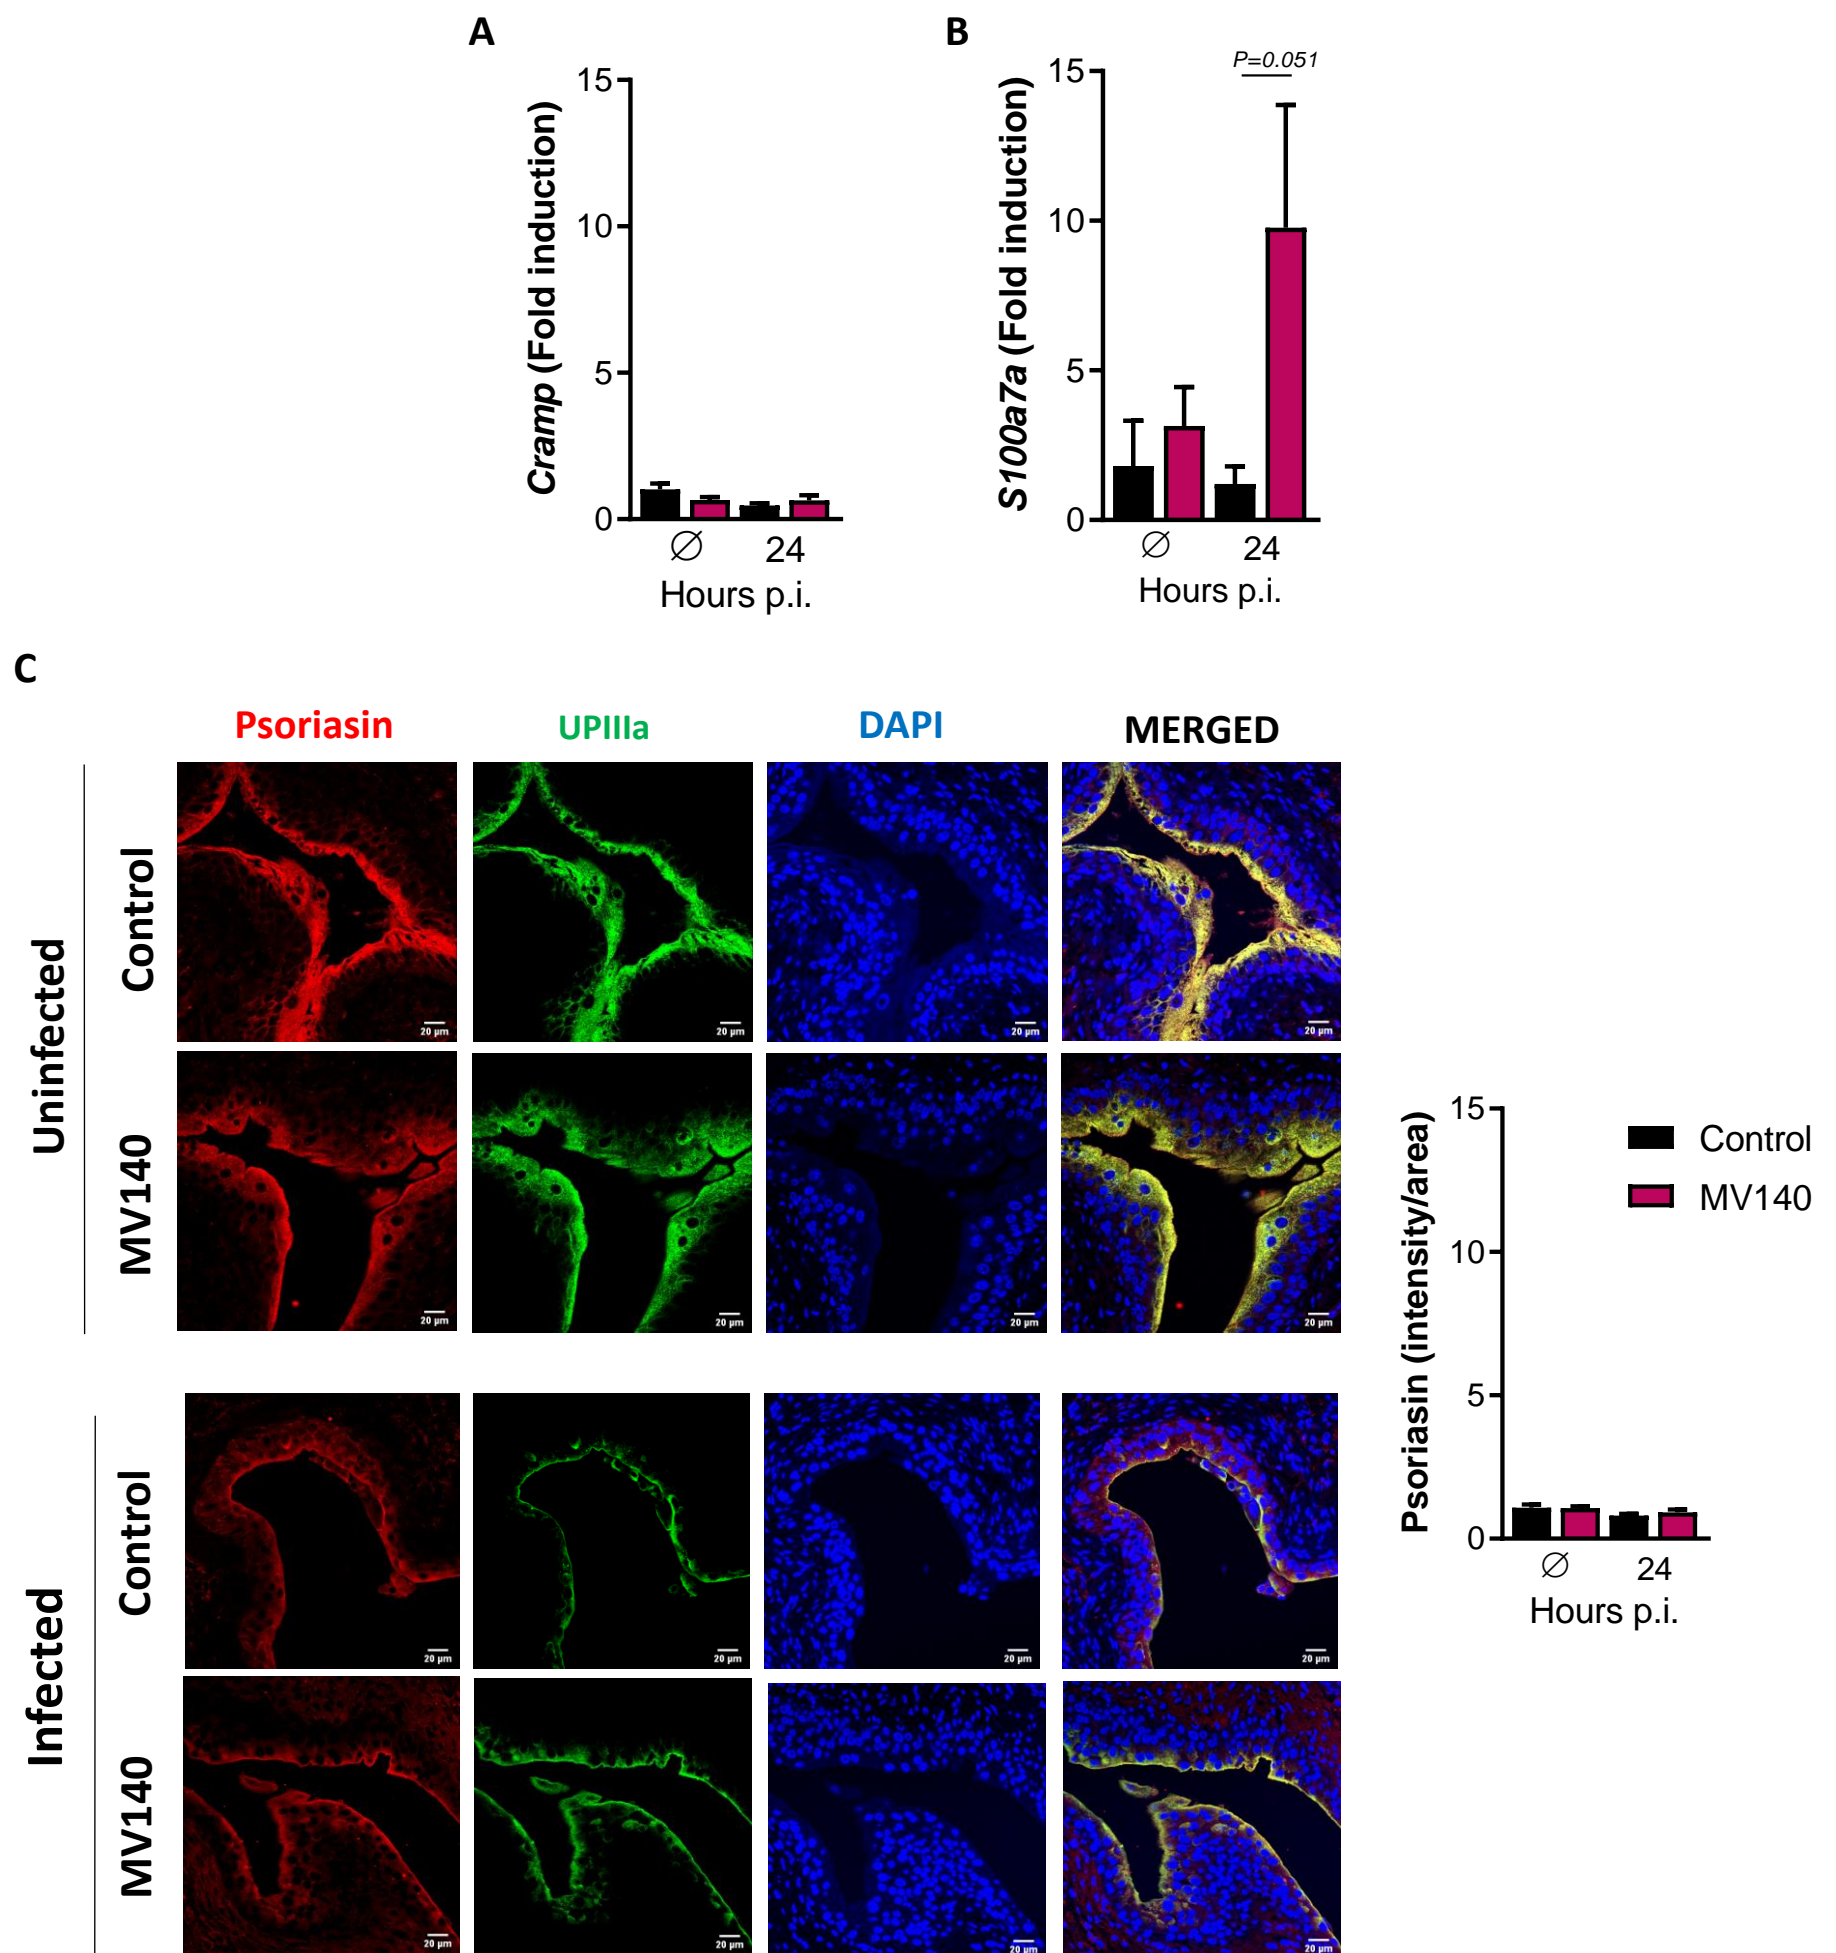

**Supplementary Figure 1. Mucosal bacterial vaccination does not significantly modulate antimicrobial peptide production in the bladder urothelium following infection. (A,B)** Antimicrobial peptide relative expression (*CRAMP*, *S100A7A* – Human psoriasin-coding gene) in total bladder at 24 hours post-infection, analyzed by q-PCR. Fold induction vs. control uninfected mice is represented. Mean + SEM of one (uninfected) or two (24 h p.i.) independent experiments is shown ( $n \geq 2$ ). **(C)** Psoriasin protein expression in bladder urothelium at 24 hours post-infection, analyzed by immunofluorescence. Quantification of intensity per area from 3-5 random view fields is represented. Mean  $\pm$  SEM of one (uninfected) or two (24 h p.i.) independent experiments is shown ( $n \geq 3$ ). (A-C) Mice were immunized with control (vaccine excipients, black) or MV140 (magenta) and subsequently infected as stated in Figure 1A. Normal distribution was assessed using Shapiro-Wilk test.  $P$  values were calculated by unpaired Student's t-test comparing between treatment groups were found.  $\emptyset$ , uninfected; p.i., post-infection; UPIIIa, uroplakin IIIa.
